# Supplementary material for: Holistic engineering of cell-free systems through proteome-reprogramming synthetic circuits
Source: PubMed Central journal article supplement (PMC7305103; doi:10.1038/s41467-020-16900-7), 2020-06-19
Supplement: 41467_2020_16900_MOESM1_ESM.pdf [file 41467_2020_16900_MOESM1_ESM.pdf]

**Title:** Supplementary Data 1

**Description:** Data from the proteomics study of the whole-cell extracts.
